# Supplementary material
Source: ML conference proceedings conference paper supplement (https://proceedings.mlr.press/v89/martens19a.html)
Supplement: Supplementary file [file martens19a-supp.pdf]

# Appendices

## A Pseudocode for the auxiliary variable crossovers

---

**Algorithm 1** One-point crossover at point  $t$

---

```
function CROSSOVER( $(x_{1:T}, y_{1:T}, t)$ )  
   $u_{1:T} \leftarrow (y_1, \dots, y_t, x_{t+1}, \dots, x_T)$   
   $v_{1:T} \leftarrow (x_1, \dots, x_t, y_{t+1}, \dots, y_T)$   
  return  $(u_{1:T}, v_{1:T})$   
end function
```

---

---

**Algorithm 2** Scheme for an auxiliary variable two-point crossover between  $\mathbf{x}_i$  and  $\mathbf{x}_j$

---

```
Pick  $t$  uniformly  $t \sim U(\{1, \dots, T\})$   
# Flip a coin to decide the direction of crossover  
if  $u < 0.5$  where  $u \sim U(0, 1)$  then  
   $(\mathbf{u}, \mathbf{v}) \leftarrow \text{CROSSOVER}(\mathbf{x}_i, \mathbf{x}_j, t)$   
else  
   $(\mathbf{v}, \mathbf{u}) \leftarrow \text{CROSSOVER}(\mathbf{x}_i, \mathbf{x}_j, t)$   
end if  
# consider all normal and flipped crossovers of  $u$  and  $v$   
for  $t \in \{1, \dots, T\}$  do  
  # Normal crossover of  $u$  and  $v$   
   $(\mathbf{z}_i, \mathbf{z}_j) \leftarrow \text{CROSSOVER}(\mathbf{u}, \mathbf{v}, t)$   
   $a_t \leftarrow \pi_i(\mathbf{z}_i)\pi_j(\mathbf{z}_j)$   
  # Flipped crossover of  $u$  and  $v$   
   $(\mathbf{z}_j, \mathbf{z}_i) \leftarrow \text{CROSSOVER}(\mathbf{u}, \mathbf{v}, t)$   
   $a_{T+t} \leftarrow \pi_i(\mathbf{z}_j)\pi_j(\mathbf{z}_i)$   
end for  
# Normalise the probabilities  
 $a_t \leftarrow a_t / \sum_s a_s$   
# Pick index  $t_0$  with probability proportional to  $a_{t_0}$   
 $t_0 \sim \text{Discrete}(a_1, \dots, a_T, a_{T+1}, \dots, a_{2T})$   
if  $t_0 \leq T$  then  
   $(\mathbf{x}_i, \mathbf{x}_j) \leftarrow \text{CROSSOVER}(\mathbf{x}_i, \mathbf{x}_j, t_0)$   
else  
   $(\mathbf{x}_j, \mathbf{x}_i) \leftarrow \text{CROSSOVER}(\mathbf{x}_i, \mathbf{x}_j, t_0)$   
end if
```

---

## B Supplementary Figures

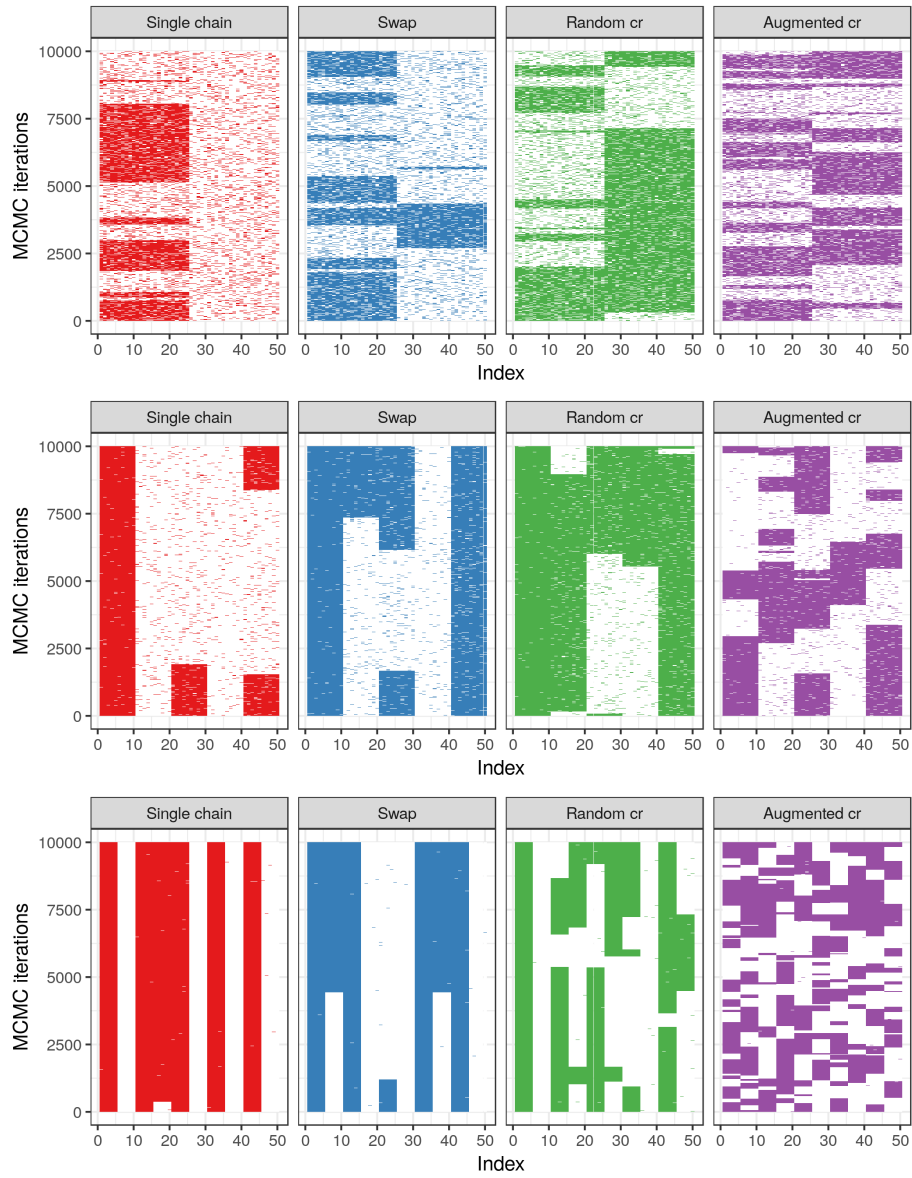

Figure 1: Heatmaps representing the trace plots of  $\mathbf{x}$  for the experiment with  $B \in \{2, 5, 10\}$  blocks, running a single chain Gibbs sampler (first panel), and its ensemble versions with various exchange moves: swap, random crossover, augmented crossover (in four panels). For each MCMC iteration, the elements of  $\mathbf{x}$  have been colour coded: dark = 1, light = 0.
